# Supplementary material for: Reconciling visual field defects and retinal nerve fibre layer asymmetric patterns in retrograde degeneration: an extended case series
Source: PubMed Central journal article supplement — Clin Exp Optom. 2016 Oct 11;100(3):214–26. doi: 10.1111/cxo.12478 (PMC5434818; doi:10.1111/cxo.12478), 2016-10-11
Supplement: CXO-100-214-s001.pdf [file CXO-100-214-s001.pdf]

SUPPLEMENTARY MATERIAL

**Reconciling visual field defects and retinal nerve fibre layer asymmetric patterns in retrograde degeneration: an extended case series**

**Barbara Zangerl** PhD DVM

**Andrew Whatham** DPhil BOptom PGCertOcTher

**Juno Kim** PhD BSc

**Agnes Cho** MOptom PGCertOcTher

**Nagi N Assaad** MBBS MBIomedE

**Michael P Hennessy** MBBS MBIomedE FRAZCO

**Michael Kalloniatis** PhD MScOptom FAAO

| Patient number | Age | Sex | VA                  |                    | SE    |       | Relevant symptoms/history                                                     | Pathology               |
|----------------|-----|-----|---------------------|--------------------|-------|-------|-------------------------------------------------------------------------------|-------------------------|
|                |     |     | RE                  | LE                 | RE    | LE    |                                                                               |                         |
| 15             | 61  | M   | 6/4.8               | 6/4.8              | -0.50 | -1.00 | Difficulty reading for 4 years, migraines                                     | Glaucoma OU             |
| 16             | 61  | F   | 6/6                 | 6/6                | 1.00  | 1.50  | Family history of glaucoma, progressed during past three years, IOP 14.5/13.0 | Normal tension glaucoma |
| 17             | 58  | M   | 6/6                 | 6/6                | -1.00 | -0.63 | Optic nerve head asymmetry, IOP 15.0 OU                                       | Normal tension glaucoma |
| 18             | 62  | M   | 6/7.5 <sup>-1</sup> | 6/12 <sup>+2</sup> | 1.25  | 1.00  | Increased glare sensitivity, IOP 15.0 OU                                      | Normal tension glaucoma |
| 19             | 59  | M   | 6/6 <sup>-1</sup>   | 6/6                | -0.50 | -0.50 | Elevated intraocular pressure                                                 | Glaucoma RE             |

VA: visual acuity, SE: spherical equivalent, OU: both eyes

**Supplementary Table 1. Glaucoma patients' characteristics. All lesions were located in the optic nerve head.**
